# Supplementary figures and images for: Bayesian inference for biophysical neuron models enables stimulus optimization for retinal neuroprosthetics
Source: eLife journal article supplement (doi:10.7554/elife.54997), 2020-10-27

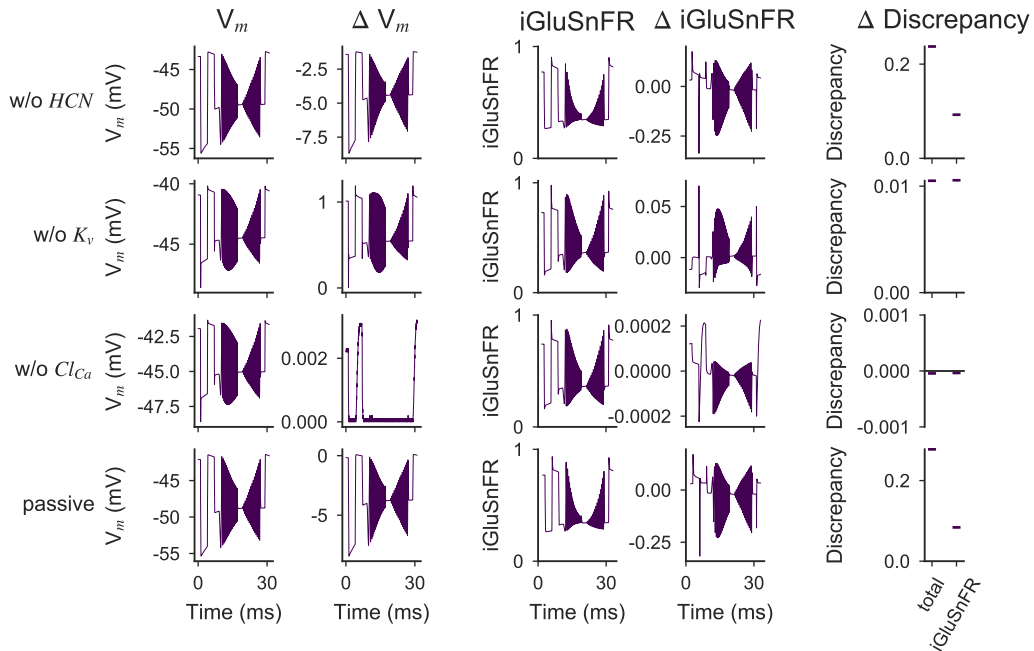

Supplement: supp [file elife-54997-supp-v1.zip]

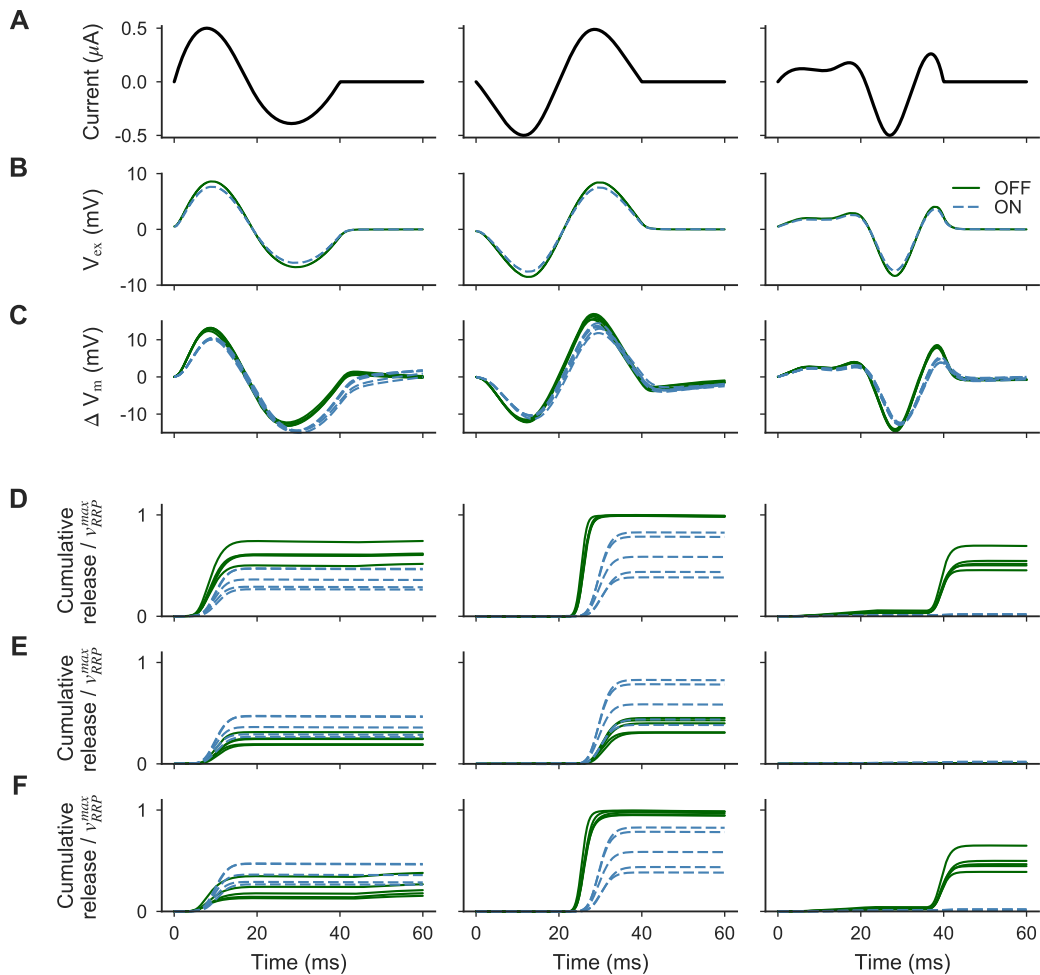

Supplement: supp [file elife-54997-supp-v1.zip]

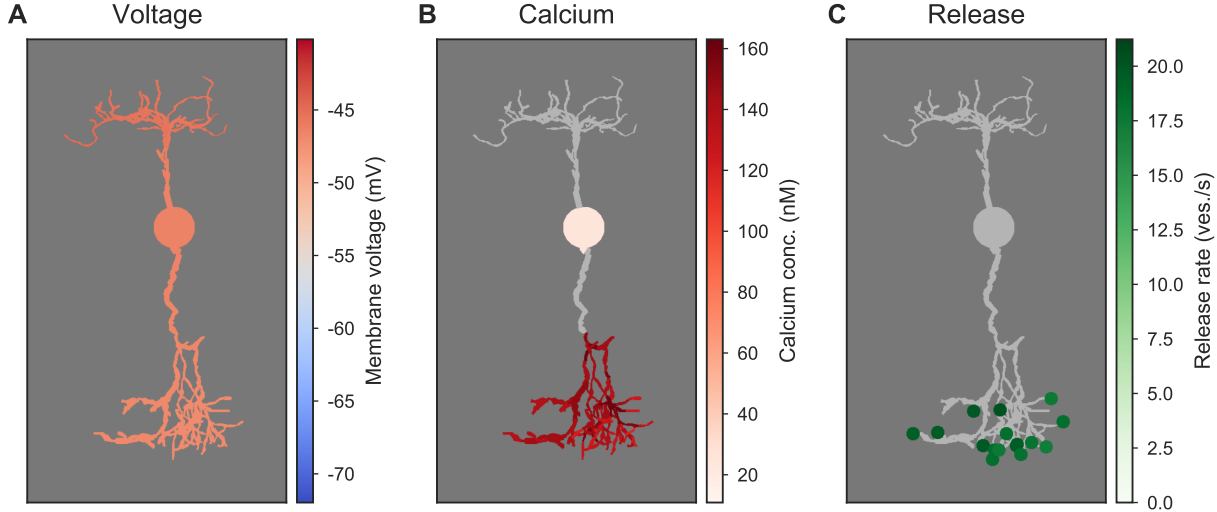

**D**

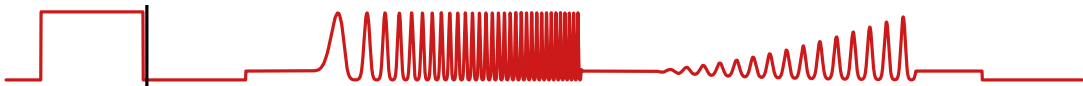

Supplement: supp [file elife-54997-supp-v1.zip]

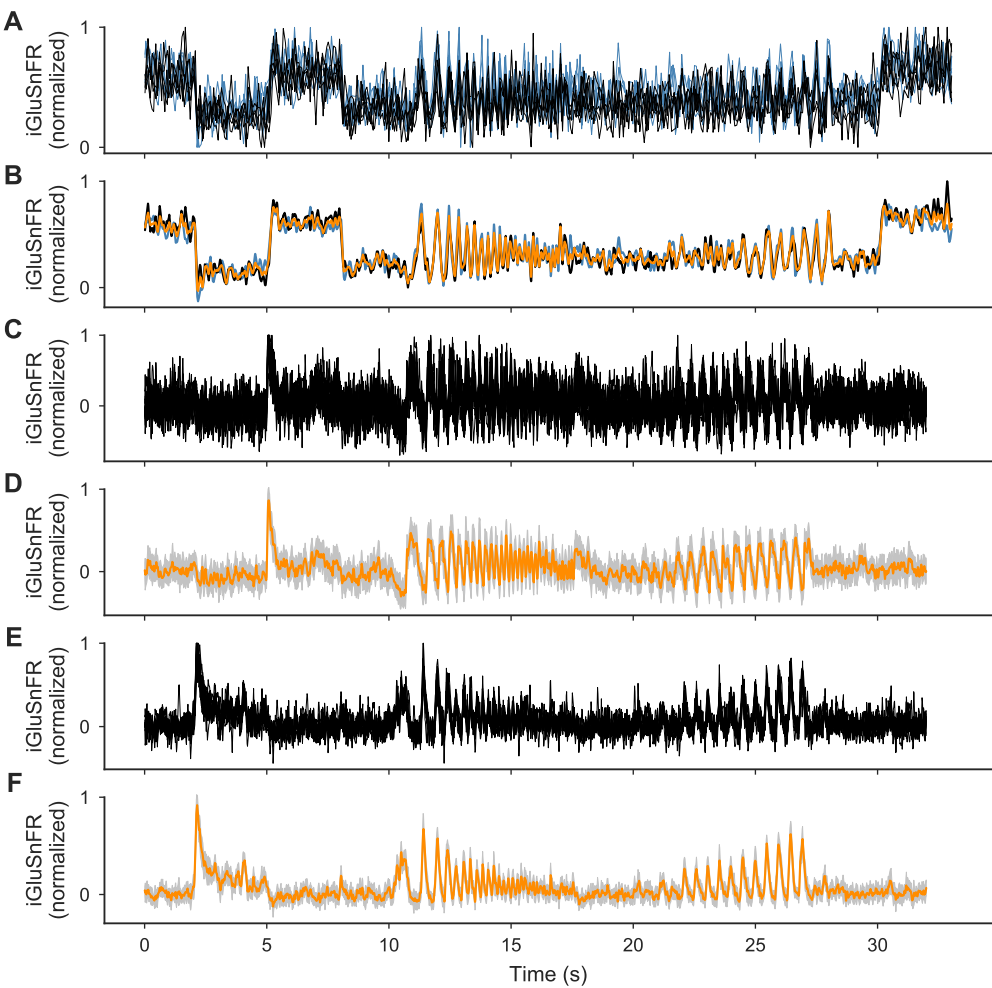

Supplement: supp [file elife-54997-supp-v1.zip]

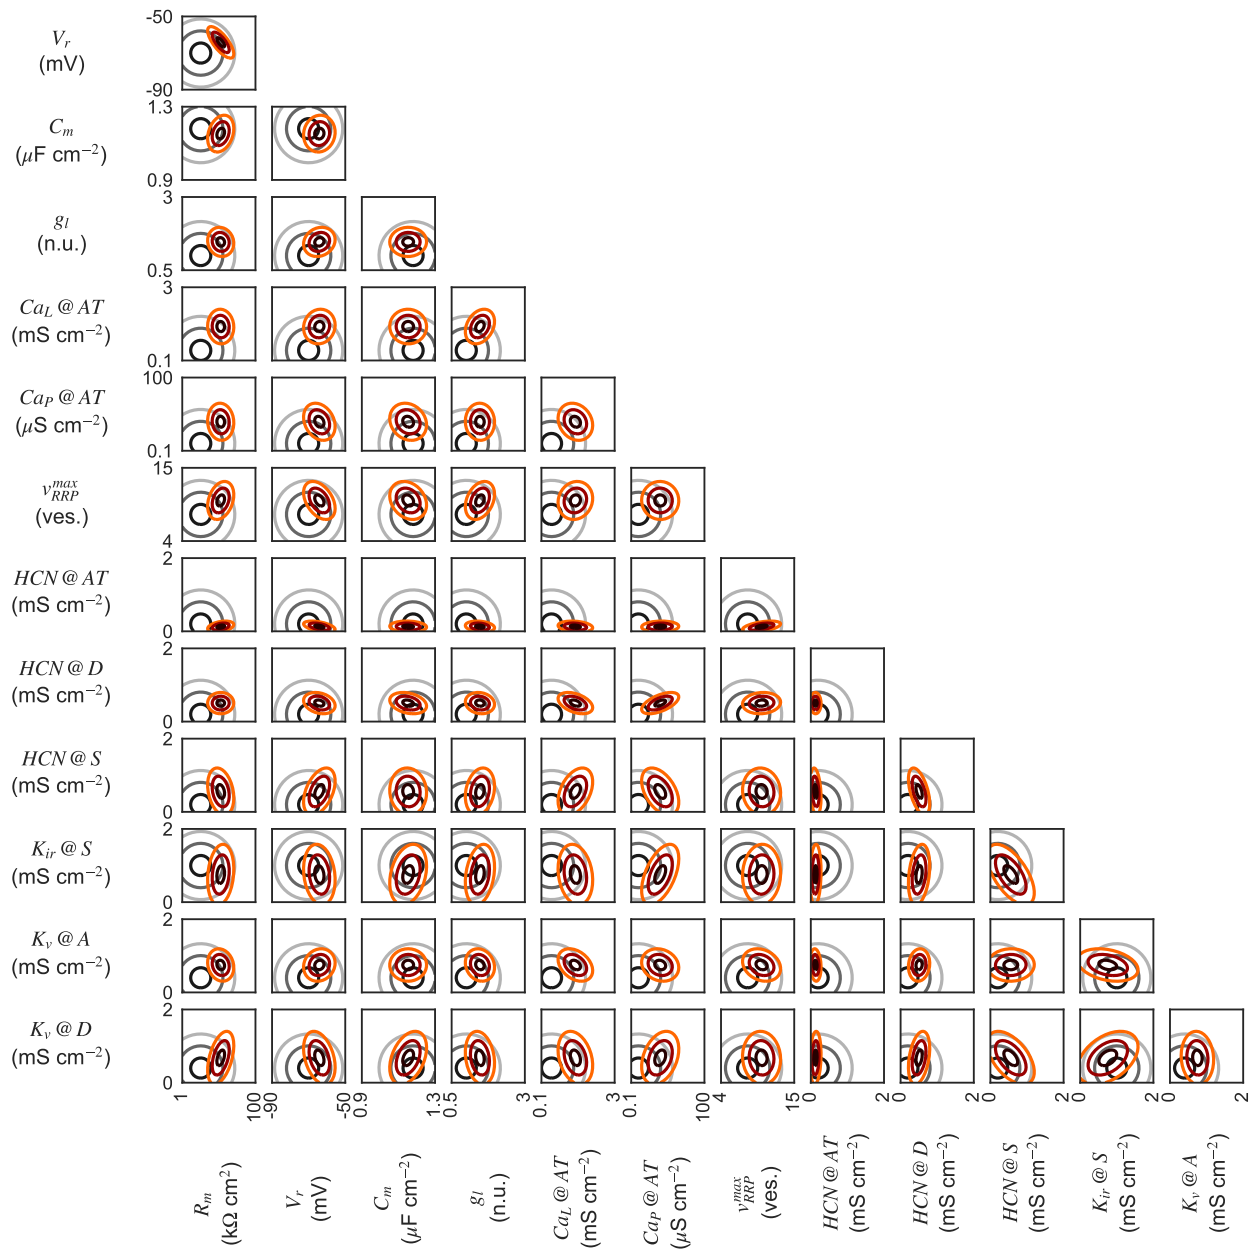

Supplement: supp [file elife-54997-supp-v1.zip]

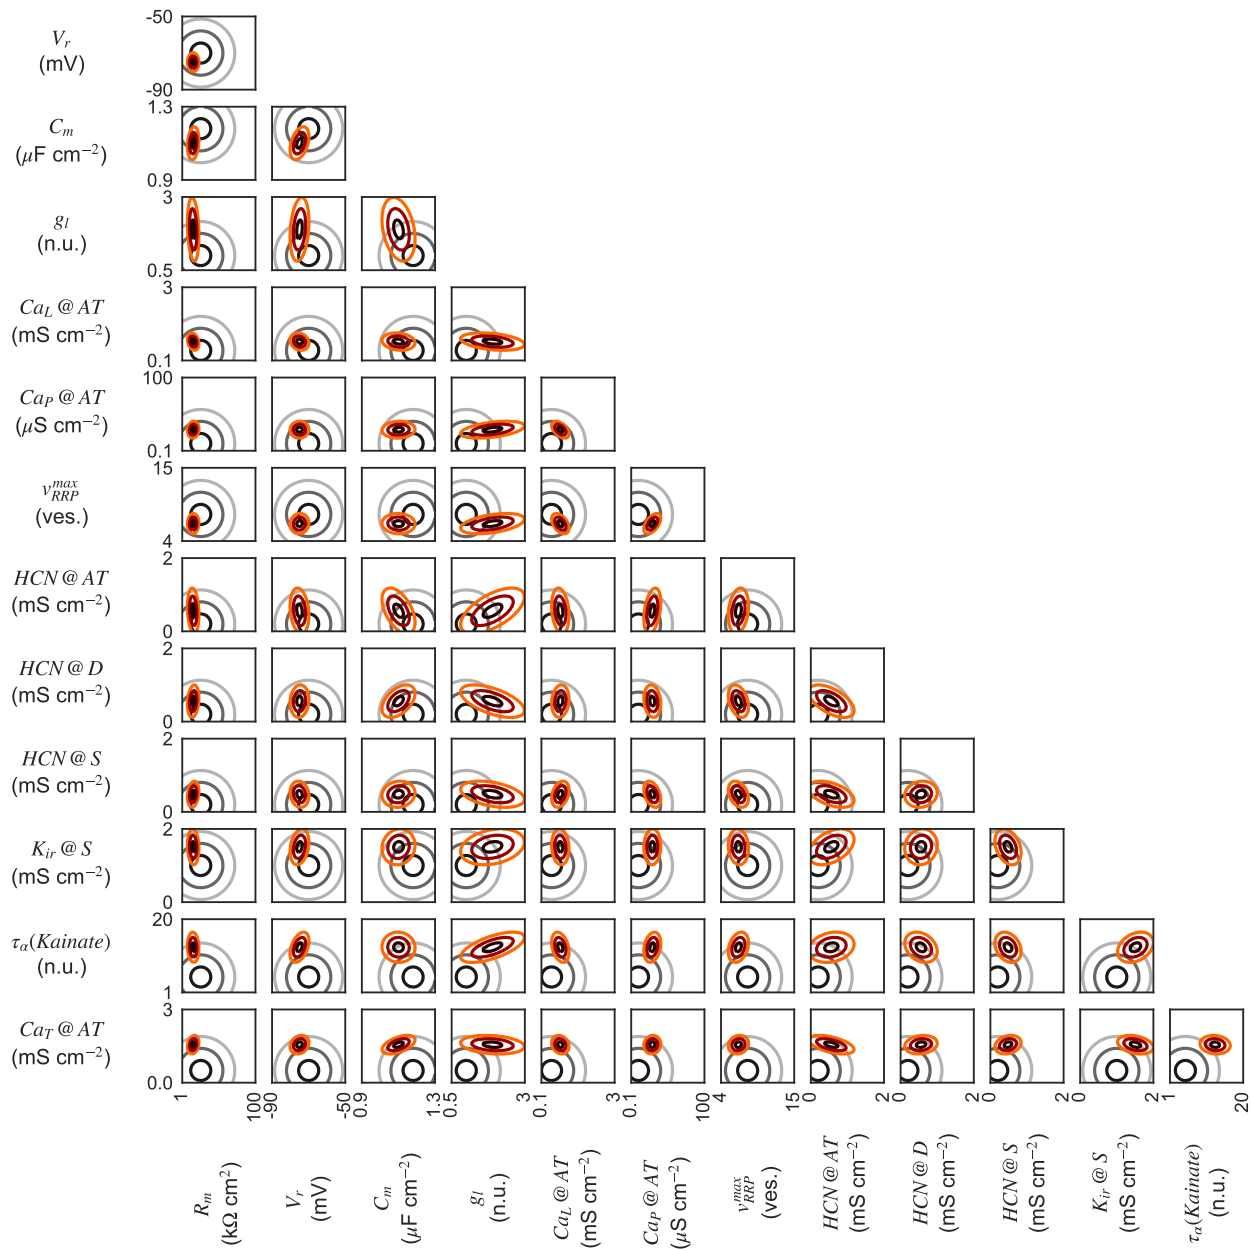

Supplement: supp [file elife-54997-supp-v1.zip]

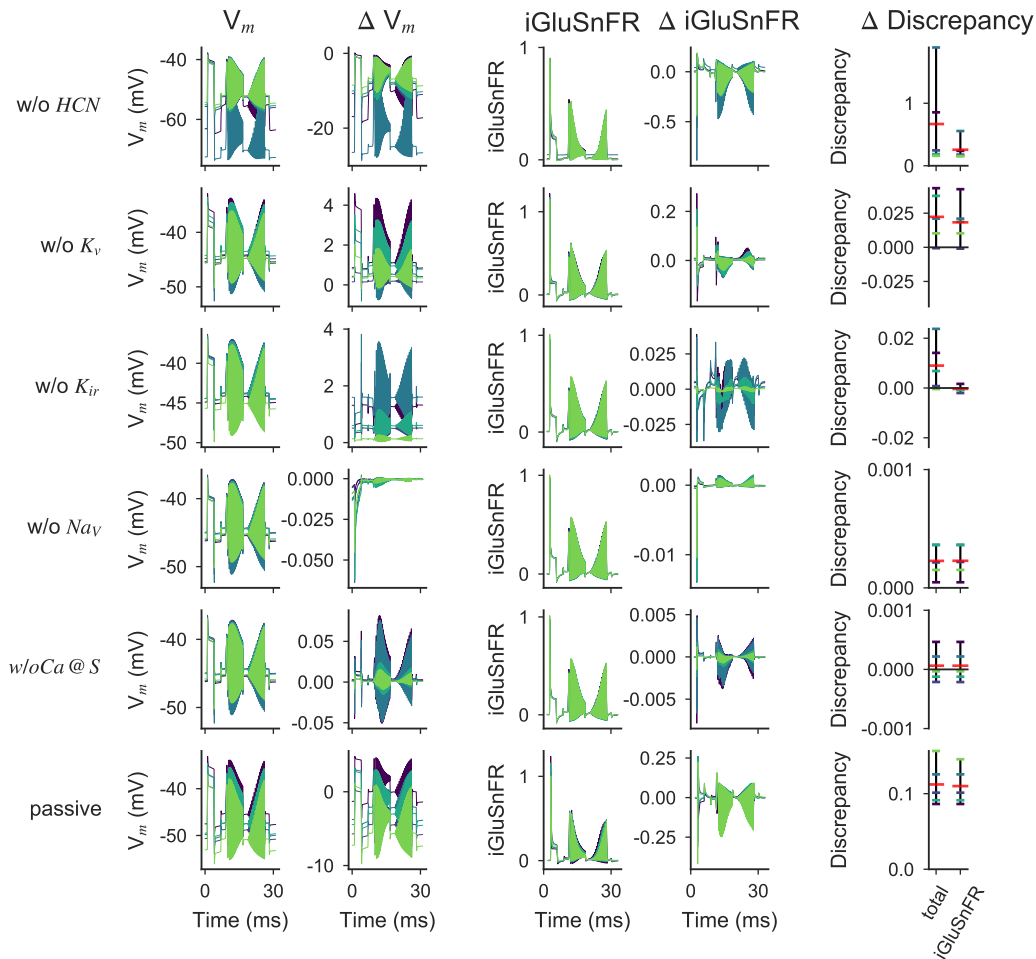

Supplement: supp [file elife-54997-supp-v1.zip]

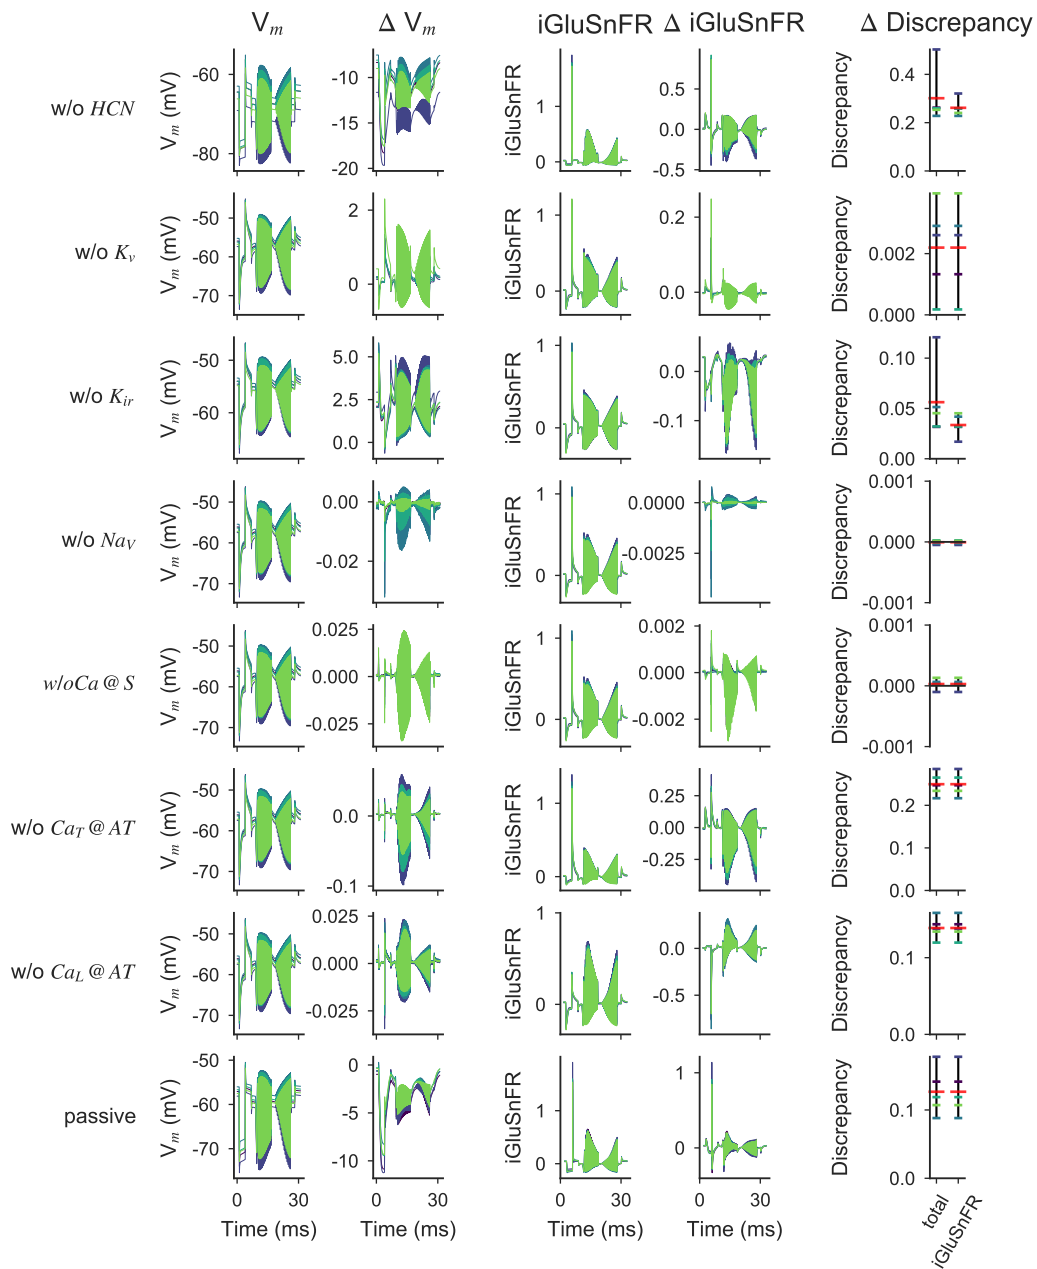

Supplement: supp [file elife-54997-supp-v1.zip]

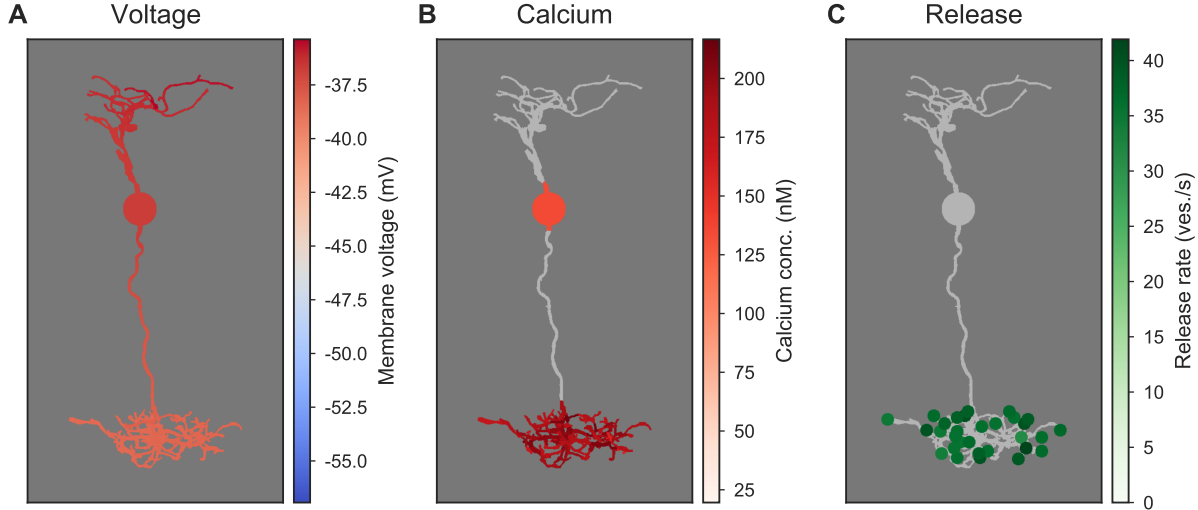

**D**

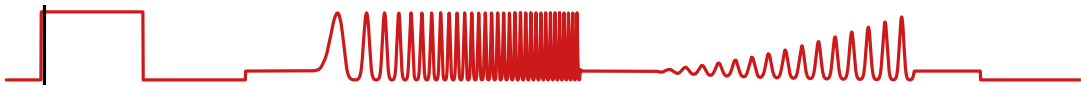

Supplement: supp [file elife-54997-supp-v1.zip]
